# Supplementary material
Source: PubMed Central journal article supplement (PMC2481556)
Supplement: blood-2007-10-115618_1.pdf [file blood-2007-10-115618_1.pdf]

|                     |                   | day 5                      |                                           | week 5                     |                                           | week 28                    |                                           |             |
|---------------------|-------------------|----------------------------|-------------------------------------------|----------------------------|-------------------------------------------|----------------------------|-------------------------------------------|-------------|
|                     |                   | TGFβRII <sup>lox/lox</sup> | TGFβRII <sup>lox/lox</sup><br>::Foxn1-Cre | TGFβRII <sup>lox/lox</sup> | TGFβRII <sup>lox/lox</sup><br>::Foxn1-Cre | TGFβRII <sup>lox/lox</sup> | TGFβRII <sup>lox/lox</sup><br>::Foxn1-Cre |             |
| SP4                 | total             | (% of total)               | 3.5 ± 0.3                                 | 5.5 ± 1.1                  | 7.3 ± 1.0                                 | 10.3 ± 1.5                 | 7.6 ± 5.2                                 | 10.7 ± 5.2  |
|                     |                   |                            | <i>p</i> = 0.012                          |                            | <i>p</i> = 0.003                          |                            | <i>p</i> = 0.2                            |             |
|                     | × 10 <sup>6</sup> |                            | 1.5 ± 0.1                                 | 2.1 ± 0.7                  | 17.4 ± 3.7                                | 25.6 ± 3.7                 | 3.4 ± 2.3                                 | 7.1 ± 4.1   |
|                     |                   |                            | <i>p</i> = 0.086                          |                            | <i>p</i> = 0.004                          |                            | <i>p</i> = 0.04                           |             |
| CD24 <sup>low</sup> | total             | (% of total)               | 1.4 ± 0.2                                 | 2.4 ± 0.7                  | 3.4 ± 1.1                                 | 6.6 ± 1.3                  | 2.7 ± 2                                   | 5.3 ± 2.8   |
|                     |                   |                            | <i>p</i> = 0.038                          |                            | <i>p</i> = 0.001                          |                            | <i>p</i> = 0.03                           |             |
|                     | × 10 <sup>6</sup> |                            | 0.6 ± 0.1                                 | 0.9 ± 0.4                  | 8.9 ± 3.5                                 | 17.5 ± 3.8                 | 1.2 ± 0.9                                 | 3.4 ± 2.0   |
|                     |                   |                            | <i>p</i> = 0.11                           |                            | <i>p</i> = 0.002                          |                            | <i>p</i> = 0.017                          |             |
| SP8                 | total             | (% of total)               | 0.9 ± 0.2                                 | 1.1 ± 0.3                  | 2.6 ± 0.8                                 | 3.9 ± 1.0                  | 1.3 ± 0.9                                 | 2.2 ± 1.4   |
|                     |                   |                            | <i>p</i> = 0.39                           |                            | <i>p</i> = 0.027                          |                            | <i>p</i> = 0.13                           |             |
|                     | × 10 <sup>6</sup> |                            | 0.4 ± 0.1                                 | 0.4 ± 0.1                  | 6.2 ± 2.2                                 | 9.9 ± 3.0                  | 0.6 ± 0.4                                 | 1.5 ± 1.1   |
|                     |                   |                            | <i>p</i> = 0.81                           |                            | <i>p</i> = 0.032                          |                            | <i>p</i> = 0.068                          |             |
| CD24 <sup>low</sup> | total             | (% of total)               | 0.47 ± 0.07                               | 0.64 ± 0.19                | 1.5 ± 0.7                                 | 2.7 ± 0.9                  | 0.59 ± 0.55                               | 1.41 ± 1.1  |
|                     |                   |                            | <i>p</i> = 0.139                          |                            | <i>p</i> = 0.023                          |                            | <i>p</i> = 0.047                          |             |
|                     | × 10 <sup>6</sup> |                            | 0.2 ± 0.1                                 | 0.3 ± 0.1                  | 4.1 ± 2.2                                 | 7.9 ± 3.0                  | 0.26 ± 0.24                               | 0.92 ± 0.81 |
|                     |                   |                            | <i>p</i> = 0.36                           |                            | <i>p</i> = 0.028                          |                            | <i>p</i> = 0.057                          |             |
